# Supplementary material for: Interperformer coordination in piano-singing duo performances: phrase structure and empathy impact
Source: Springer Nature journal article supplement (doi:10.1007/s00426-023-01818-8), 2023-04-19
Supplement: MOESM1 [file 25261856]

# Automne

Gabriel Fauré

Op. 18 N. 3

Andante moderato  $\text{♩} = 66$  [-c. 72] *f*

Voice

Piano

*p* *mf* *mf*

*sempre legato*

Au -

4

tom - ne au ciel bru-meux, aux ho - ri-zons na-vrants,

*mf*

7

*sempre f*

Aux ra - pi - des cou-chants, aux au - ro - res pâ-li

*mf*

10

*f*

es, Je re - gar - de cou-ler, com-me l'eau du tor - rent, Tes

*sf* *sf* *sf*

2  
13

days made of mel-ancholy - e. Sur

*dim.* *dolcissimo*

*Red.* *Red.* *Red.*

Detailed description: This system contains measures 13, 14, 15, and 16. The vocal line starts with a fermata over the first measure. The piano accompaniment features a steady eighth-note pattern in the left hand and a more melodic line in the right hand. Dynamics include *dim.* and *dolcissimo*. There are three *Red.* markings with asterisks in the piano part.

17

I - le des re-grets mes es- prits em - por-tés, Com - me s'il se pou-vait que no -

*sempre pp*

*Red.* *Red.* *Red.*

Detailed description: This system contains measures 17, 18, and 19. The vocal line continues with a similar melodic flow. The piano accompaniment maintains the eighth-note texture. Dynamics include *sempre pp*. There are three *Red.* markings with asterisks in the piano part.

20

tre à - ge re-nais - se! Par - cou - rent en rê-vant les co - teaux en - chan-tés, Où, ja -

*cresc. molto* *cresc.*

Detailed description: This system contains measures 20, 21, and 22. The vocal line shows a slight increase in intensity. The piano accompaniment features a *cresc. molto* marking. There are three *Red.* markings with asterisks in the piano part.

23

dis, sou-rit ma jeu - nes - se! Je

*f* *sempre* *p* *dimin.*

Detailed description: This system contains measures 23, 24, and 25. The vocal line concludes with a fermata. The piano accompaniment features a *f* dynamic and a *dimin.* marking. There are three *Red.* markings with asterisks in the piano part.

sens, — au clair so- leil du sou - ve - nir vain - queur, — Re - fleu -

*p* *sempre p*

rir en bou - quet — les ro - ses dé - li - é - es, Et mon -

*poco a poco cresc.*

ter à mes yeux, des lar - mes, qu'en mon cœur, Mes vingt ans — a - vaient ou - bli -

*f*

é - es!

*f sempre* *dimin.*
