# Supplementary material for: Interperformer coordination in piano-singing duo performances: phrase structure and empathy impact
Source: Springer Nature journal article supplement (doi:10.1007/s00426-023-01818-8), 2023-04-19
Supplement: MOESM2 [file 25261856]

# Die Kartenlegerin

Op. 31 N. 2

Lebhaft, leise *p*

Voice

Schlie - f die Mut - ter end - lich ein ü - ber ih - rer Hau - po - stil - le?

Piano

7

Na - del, lie - ge du nun stil - le, nä - hen, im - mer nä - hen, nein! nä - hen, im - mer nä - hen! nein!

13

Ei, was hab ich zu er - war - ten? ei, was wird das En - de sein, ei, was wird das En - de sein?

*ritard.*

20

*a tempo* *p* *ritard.*

Trü - get mich die Ahnung nicht, zeigt sich ei - ner, den ich mei - ne,

*ritard.*

26 *a tempo*

schön, da kommt er ja, der ei-ne, Coeur-Bub kann-te sei - ne Pflicht. Ei-ne rei-che Wit-we? We-he!

*a tempo*

32 *ritard.*

Ja, er freit sie, ich ver-ge he! o verruchter Bö-se - wicht, o verruchter Bö - se -

*ritard.*

39 *Schneller* *p*

wicht! Her-ze leid, und viel Ver-druß, ei-ne Schul und en- ge

48

Mau - ern - - Ka-ro Kö - nig, der be - dau - ern und zu - letzt mich trö - sten muß.

57

Ein Ge schenk auf art - ge Wei - se er ent - führt mich ei - ne Rei - se

65

Geld und Lust in Ü - ber - fluß, Geld und Lust in Ü - ber - fluß!

74

Die - ser Ka - ro - Kö - nig da

82

muß ein Fürst sein, o - der Kö - nig, und es fehlt dar - an nur we - nig, bin ich sel - ber Für - stin ja,

88

bin ich sel - ber Für - stin ja. Hier ein Feind, der mir zu scha - den sich be - müht bei sei - ner Gna - den,

94 *ritard.*

und ein Blon-der steht mir nah\_ Ein Ge-heim-nis kommt zu Ta-ge, und ich flüch-te

*ritard.*

103

noch bei-zei-ten fah-ret wohl, ihr Herr-lich-kei-ten, O das war ein har-ter

112 *Quasi Recitativo* *accel.*

Schlag! Hin ist ei-ner\_ ei-ne Men-ge bil-den um mich ein Ge-drän-ge, daß ich

*f* *f* *f*

*Red.* *Red.*

120

sie kaum zäh-len-mag.

*f* *p* *p*

*Red.*

126

*p*

132

*p*

Kommt das dum-me Fraun - ge-sicht, kommt die Al - te da mit Keu-chen, Lieb und Lust mir

137

zu ver-scheu-chen, eh die Ju-gend mir gebricht, eh die Ju-gend mir ge-bricht? Ach, die Mut-ter

143

*ritard.*

*Expression*

ist's, die aufwacht, und den Mund zu schel-ten auf-macht nein, die Kar-ten lü - gen nicht, nein, die

*ritard.* *p*

149

Kar-ten lü-gen nicht, nein, die Kar-ten-lü-gen nicht!
